# Supplementary material for: A closer look at the apparent correlation of structural and functional connectivity in excitable neural networks
Source: PubMed Central journal article supplement — Sci Rep. 2015 Jan 19;5:7870. doi: 10.1038/srep07870 (PMC4297952; doi:10.1038/srep07870), 2015-01-19
Supplement: srep07870-s1.pdf [file srep07870-s1.pdf]

# A closer look at the apparent correlation of structural and functional connectivity in excitable neural networks

Arnaud Messé,<sup>1,\*</sup> Marc-Thorsten Hütt,<sup>2</sup> Peter König,<sup>3</sup> and Claus C. Hilgetag<sup>1,4</sup>

<sup>1</sup>*Department of Computational Neuroscience, University Medical Center Eppendorf, Hamburg University, Germany*

<sup>2</sup>*School of Engineering and Science, Jacobs University Bremen, Germany*

<sup>3</sup>*Department of Cognitive Science, University Osnabrück, Germany*

<sup>4</sup>*Department of Health Sciences, Boston University, USA*

---

\* Correspondence to [a.messe@uke.de](mailto:a.messe@uke.de)

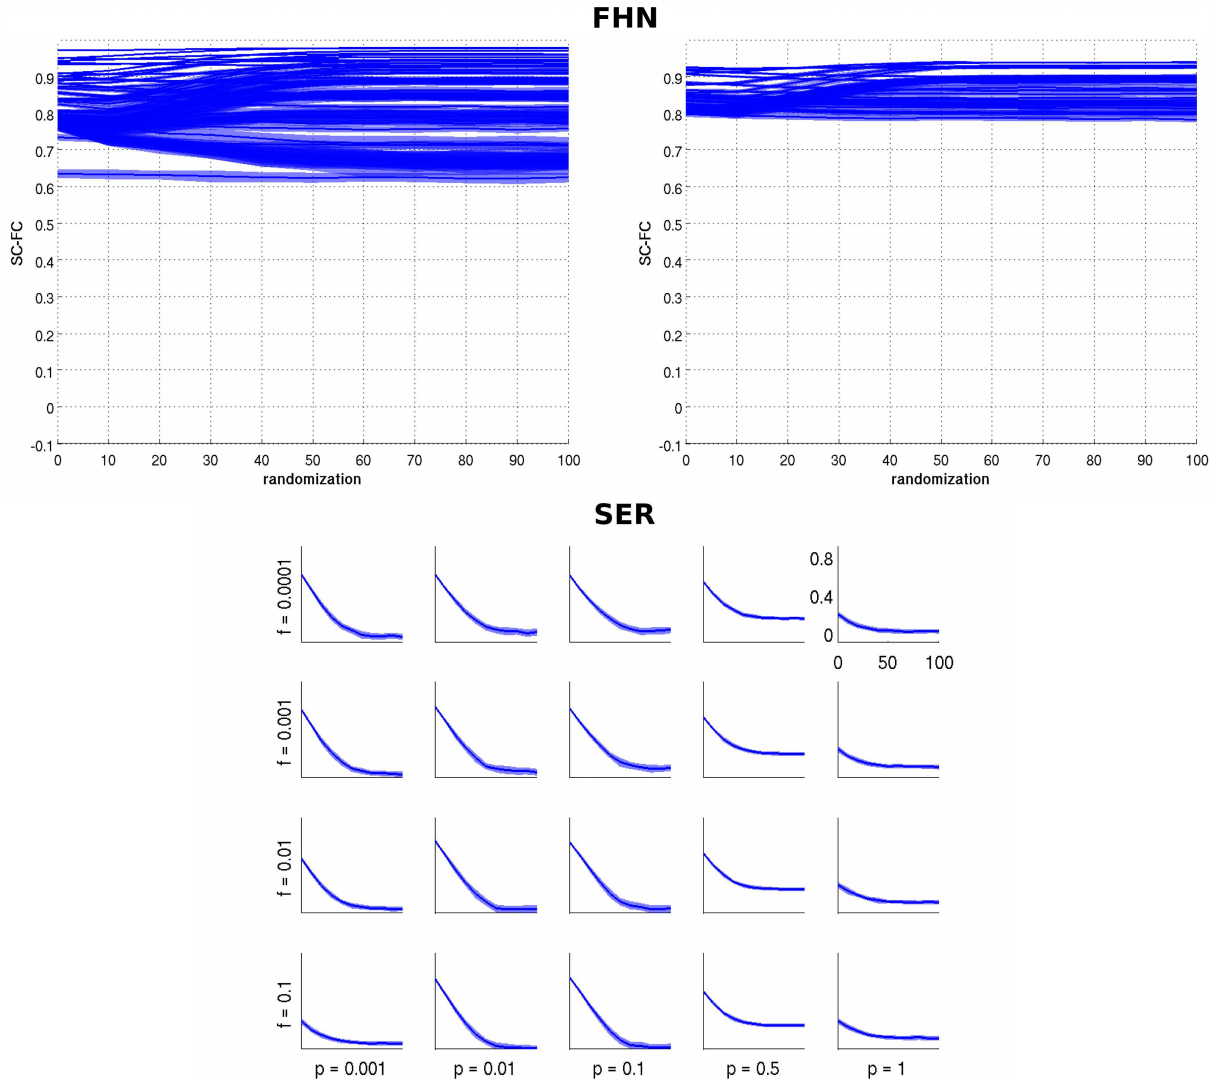

FIG. S1. **Robustness of the SC-FC relationship against parameters setting.** (Top) For the FHN model with various timescales (left, with  $\tau_x \in \{.2, .4, .8, 2, 4, 8, 16\}$   $ms$  and  $\tau_y \in \{2, 10, 20, 50, 100, 200, 500\}$   $ms$ ) and various  $\alpha$  and  $\beta$  (right, from .2 to 1.4 by step of .2). (Bottom) For the SER with various  $f$  (rows) and  $p$  (columns).
